# Supplementary material for: MicroRNA-22 negatively regulates poly(I:C)-triggered type I interferon and inflammatory cytokine production via targeting mitochondrial antiviral signaling protein (MAVS)
Source: PubMed Central journal article supplement (PMC5363539; doi:10.18632/oncotarget.12395), 2016-10-01
Supplement: oncotarget-07-76667-s001.pdf [file oncotarget-07-76667-s001.pdf]

## MicroRNA-22 negatively regulates poly(I:C)-triggered type I interferon and inflammatory cytokine production via targeting mitochondrial antiviral signaling protein (MAVS)

### Supplementary Materials

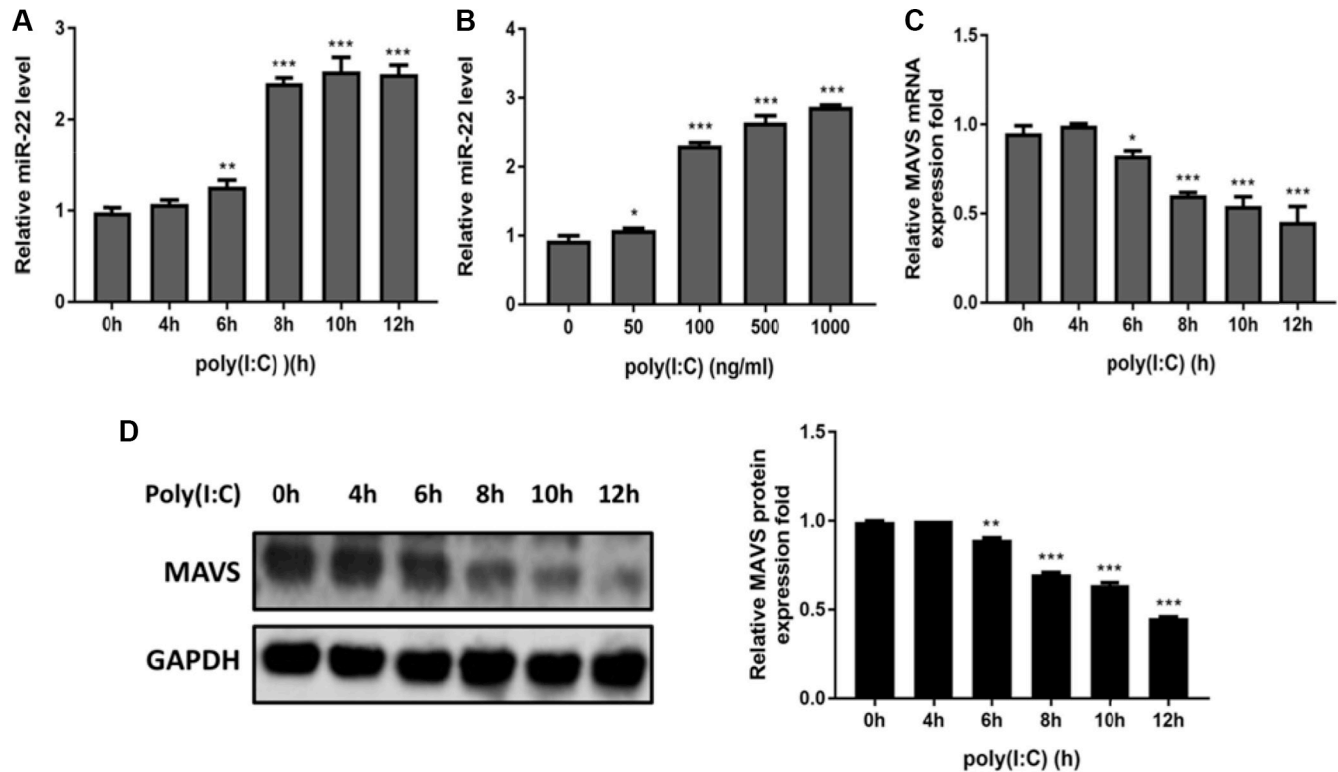

**Supplementary Figure S1: miR-22 is upregulated in poly(I:C)-treated SH-SY5Y cells.** (A and B) Human SH-SY5Y cells were transfected with 100 ng/ml poly(I:C) for different periods (A) or with different concentrations for 6 h (B), and miR-22 level was determined with quantitative real-time PCR. (C and D) SH-SY5Y cells were transfected with 100 ng/ml poly(I:C) for different periods, and MAVS mRNA (C) and protein (D.) levels were determined with quantitative real-time PCR and immunoblotting, respectively. Data represent means  $\pm$  SD from three independent experiments. \* $p < 0.05$ ; \*\* $p < 0.01$ ; \*\*\* $p < 0.001$ . Protein levels were quantified with immunoblot scanning and normalized to the amount of GAPDH expression.
